# Supplementary material for: Disease candidate gene identification and prioritization using protein interaction networks
Source: Springer Nature journal article supplement (doi:10.1186/1471-2105-10-73), 2009-02-27
Supplement: Additional file 2 [file 1471-2105-10-73-S2.pdf]

| Disease name     | "Target" gene ID | "Target" gene symbol | "Target" gene name                                                                                      | "Target" gene in PPIN?                                                                                                         |     |
|------------------|------------------|----------------------|---------------------------------------------------------------------------------------------------------|--------------------------------------------------------------------------------------------------------------------------------|-----|
| Ischaemic stroke | 1636             | ACE                  | angiotensin I converting enzyme (peptidyl-dipeptidase A) 1                                              | Yes                                                                                                                            |     |
|                  | 241              | ALOX5AP              | arachidonate 5-lipoxygenase-activating protein                                                          | Yes                                                                                                                            |     |
|                  | 335              | APOA1                | apolipoprotein A-1                                                                                      | Yes                                                                                                                            |     |
|                  | 348              | APOE                 | apolipoprotein E                                                                                        | Yes                                                                                                                            |     |
|                  | 11132            | CAPN10               | calpain 10                                                                                              | No                                                                                                                             |     |
|                  | 6347             | CCL2                 | chemokine (C-C motif) ligand 2                                                                          | Yes                                                                                                                            |     |
|                  | 929              | CD14                 | CD14 molecule                                                                                           | Yes                                                                                                                            |     |
|                  | 1401             | CRP                  | C-reactive protein, pentraxin-related                                                                   | Yes                                                                                                                            |     |
|                  | 2053             | EPHX2                | epoxide hydrolase 2, cytoplasmic                                                                        | No                                                                                                                             |     |
|                  | 2161             | F12                  | coagulation factor XII (Hageman factor)                                                                 | Yes                                                                                                                            |     |
|                  | 2162             | F13A1                | coagulation factor XIII, A1 polypeptide                                                                 | Yes                                                                                                                            |     |
|                  | 2147             | F2                   | coagulation factor II (thrombin)                                                                        | Yes                                                                                                                            |     |
|                  | 2153             | F5                   | coagulation factor V (proaccelerin, labile factor)                                                      | Yes                                                                                                                            |     |
|                  | 2155             | F7                   | coagulation factor VII (serum prothrombin conversion accelerator)                                       | Yes                                                                                                                            |     |
|                  | 2243             | FGA                  | fibrinogen alpha chain                                                                                  | Yes                                                                                                                            |     |
|                  | 2244             | FGB                  | fibrinogen beta chain                                                                                   | Yes                                                                                                                            |     |
|                  | 2811             | GP1BA                | glycoprotein Ib (platelet), alpha polypeptide                                                           | Yes                                                                                                                            |     |
|                  | 3106             | HLA-B                | major histocompatibility complex, class I, B                                                            | Yes                                                                                                                            |     |
|                  | 3119             | HLA-DQB1             | major histocompatibility complex, class II, DQ beta 1                                                   | Yes                                                                                                                            |     |
|                  | 3122             | HLA-DRA              | major histocompatibility complex, class II, DR alpha                                                    | Yes                                                                                                                            |     |
|                  | 3123             | HLA-DRB1             | major histocompatibility complex, class II, DR beta 1                                                   | Yes                                                                                                                            |     |
|                  | 3383             | ICAM1                | intercellular adhesion molecule 1 (CD54), human rhinovirus receptor                                     | Yes                                                                                                                            |     |
|                  | 3553             | IL1B                 | interleukin 1, beta                                                                                     | Yes                                                                                                                            |     |
|                  | 3569             | IL6                  | interleukin 6 (interferon, beta 2)                                                                      | Yes                                                                                                                            |     |
|                  | 3673             | ITGA2                | integrin, alpha 2 (CD49B, alpha 2 subunit of VLA-2 receptor)                                            | Yes                                                                                                                            |     |
|                  | 3674             | ITGA2B               | integrin, alpha 2b (platelet glycoprotein IIb of IIb/IIIa complex, antigen CD41)                        | Yes                                                                                                                            |     |
|                  | 3675             | ITGA3                | integrin, alpha 3 (antigen CD49C, alpha 3 subunit of VLA-3 receptor)                                    | Yes                                                                                                                            |     |
|                  | 3676             | ITGA4                | integrin, alpha 4 (antigen CD49D, alpha 4 subunit of VLA-4 receptor)                                    | Yes                                                                                                                            |     |
|                  | 3690             | ITGB3                | integrin, beta 3 (platelet glycoprotein IIIa, antigen CD61)                                             | Yes                                                                                                                            |     |
|                  | 4282             | MIF                  | macrophage migration inhibitory factor (glycosylation-inhibiting factor)                                | Yes                                                                                                                            |     |
|                  | 4314             | MMP3                 | matrix metalloproteinase 3 (stromelysin 1, progelatinase)                                               | Yes                                                                                                                            |     |
|                  | 4524             | MTHFR                | 5,10-methylenetetrahydrofolate reductase (NADPH)                                                        | Yes                                                                                                                            |     |
|                  | 4846             | NOS3                 | nitric oxide synthase 3 (endothelial cell)                                                              | Yes                                                                                                                            |     |
|                  | 4883             | NPR3                 | natriuretic peptide receptor C/guanylate cyclase C (atrionatriuretic peptide receptor C)                | Yes                                                                                                                            |     |
|                  | 5144             | PDE4D                | phosphodiesterase 4D, cAMP-specific (phosphodiesterase E3 duncce homolog, Drosophila)                   | Yes                                                                                                                            |     |
|                  | 5327             | PLAT                 | plasminogen activator, tissue                                                                           | Yes                                                                                                                            |     |
|                  | 5444             | PON1                 | paraoxonase 1                                                                                           | Yes                                                                                                                            |     |
|                  | 8858             | PROZ                 | protein Z, vitamin K-dependent plasma glycoprotein                                                      | No                                                                                                                             |     |
|                  | 6401             | SELE                 | selectin E (endothelial adhesion molecule 1)                                                            | Yes                                                                                                                            |     |
|                  | 5265             | SERPINA1             | serpin peptidase inhibitor, clade A (alpha-1 antiproteinase, antitrypsin), member 1                     | Yes                                                                                                                            |     |
|                  | 5054             | SERPINE1             | serpin peptidase inhibitor, clade E (nexin, plasminogen activator inhibitor type 1), member 1           | Yes                                                                                                                            |     |
|                  | 6548             | SLC9A1               | solute carrier family 9 (sodium/hydrogen exchanger), member 1 (antiporter, Na+/H+, amiloride sensitive) | Yes                                                                                                                            |     |
|                  | 7099             | TLR4                 | toll-like receptor 4                                                                                    | Yes                                                                                                                            |     |
|                  | 7124             | TNF                  | tumor necrosis factor (TNF superfamily, member 2)                                                       | Yes                                                                                                                            |     |
|                  | Endometriosis    | 196                  | AHR                                                                                                     | aryl hydrocarbon receptor                                                                                                      | Yes |
|                  |                  | 197                  | AHSG                                                                                                    | alpha-2-HS-glycoprotein                                                                                                        | Yes |
|                  |                  | 367                  | AR                                                                                                      | androgen receptor (dihydrotestosterone receptor; testicular feminization; spinal and bulbar muscular atrophy; Kennedy disease) | Yes |
|                  | 405              | ARNT                 | aryl hydrocarbon receptor nuclear translocator                                                          | Yes                                                                                                                            |     |
|                  | 6352             | CCL5                 | chemokine (C-C motif) ligand 5                                                                          | Yes                                                                                                                            |     |
|                  | 1231             | CCR2                 | chemokine (C-C motif) receptor 2                                                                        | Yes                                                                                                                            |     |
|                  | 1234             | CCR5                 | chemokine (C-C motif) receptor 5                                                                        | Yes                                                                                                                            |     |
|                  | 1312             | COMT                 | catechol-O-methyltransferase                                                                            | Yes                                                                                                                            |     |
|                  | 1493             | CTLA4                | cytotoxic T-lymphocyte-associated protein 4                                                             | Yes                                                                                                                            |     |
|                  | 1586             | CYP17A1              | cytochrome P450, family 17, subfamily A, polypeptide 1                                                  | Yes                                                                                                                            |     |
|                  | 1588             | CYP19A1              | cytochrome P450, family 19, subfamily A, polypeptide 1                                                  | Yes                                                                                                                            |     |
|                  | 1543             | CYP1A1               | cytochrome P450, family 1, subfamily A, polypeptide 1                                                   | Yes                                                                                                                            |     |
|                  | 1545             | CYP1B1               | cytochrome P450, family 1, subfamily B, polypeptide 1                                                   | Yes                                                                                                                            |     |
|                  | 1571             | CYP2E1               | cytochrome P450, family 2, subfamily E, polypeptide 1                                                   | Yes                                                                                                                            |     |
|                  | 2052             | EPHX1                | epoxide hydrolase 1, microsomal (xenobiotic)                                                            | No                                                                                                                             |     |
|                  | 2099             | ESR1                 | estrogen receptor 1                                                                                     | Yes                                                                                                                            |     |
|                  | 2100             | ESR2                 | estrogen receptor 2 (ER beta)                                                                           | Yes                                                                                                                            |     |

|               |        |              |                                                                                               |     |
|---------------|--------|--------------|-----------------------------------------------------------------------------------------------|-----|
|               | 355    | FAS          | Fas (TNF receptor superfamily, member 6)                                                      | Yes |
|               | 356    | FASLG        | Fas ligand (TNF superfamily, member 6)                                                        | Yes |
|               | 2592   | GALT         | galactose-1-phosphate uridylyltransferase                                                     | Yes |
|               | 2944   | GSTM1        | glutathione S-transferase M1                                                                  | Yes |
|               | 2952   | GSTT1        | glutathione S-transferase theta 1                                                             | No  |
|               | 3105   | HLA-A        | major histocompatibility complex, class I, A                                                  | Yes |
|               | 3106   | HLA-B        | major histocompatibility complex, class I, B                                                  | Yes |
|               | 3107   | HLA-C        | major histocompatibility complex, class I, C                                                  | Yes |
|               | 3115   | HLA-DPB1     | major histocompatibility complex, class II, DP beta 1                                         | Yes |
|               | 3117   | HLA-DQA1     | major histocompatibility complex, class II, DQ alpha 1                                        | No  |
|               | 3119   | HLA-DQB1     | major histocompatibility complex, class II, DQ beta 1                                         | Yes |
|               | 3123   | HLA-DRB1     | major histocompatibility complex, class II, DR beta 1                                         | Yes |
|               | 3292   | HSD17B1      | hydroxysteroid (17-beta) dehydrogenase 1                                                      | No  |
|               | 3383   | ICAM1        | intercellular adhesion molecule 1 (CD54), human rhinovirus receptor                           | Yes |
|               | 3458   | IFNG         | interferon, gamma                                                                             | Yes |
|               | 3565   | IL4          | interleukin 4                                                                                 | Yes |
|               | 3569   | IL6          | interleukin 6 (interferon, beta 2)                                                            | Yes |
|               | 4312   | MMP1         | matrix metalloproteinase 1 (interstitial collagenase)                                         | Yes |
|               | 4314   | MMP3         | matrix metalloproteinase 3 (stromelysin 1, progelatinase)                                     | Yes |
|               | 4353   | MPO          | myeloperoxidase                                                                               | No  |
|               | 10     | NAT2         | N-acetyltransferase 2 (arylamine N-acetyltransferase)                                         | No  |
|               | 8204   | NRIP1        | nuclear receptor interacting protein 1                                                        | Yes |
|               | 5241   | PGR          | progesterone receptor                                                                         | Yes |
|               | 7124   | TNF          | tumor necrosis factor (TNF superfamily, member 2)                                             | Yes |
|               | 7133   | TNFRSF1B     | tumor necrosis factor receptor superfamily, member 1B                                         | Yes |
|               | 7422   | VEGFA        | vascular endothelial growth factor A                                                          | Yes |
| <b>Autism</b> | 100    | ADA          | adenosine deaminase                                                                           | Yes |
|               | 116987 | CENTG2       | centaurin, gamma 2                                                                            | Yes |
|               | 129446 | XIRP2(CMYA3) | xin actin-binding repeat containing 2                                                         | No  |
|               | 1641   | DCX          | doublecortin; lissencephaly, X-linked (doublecortin)                                          | Yes |
|               | 2020   | EN2          | engrailed homeobox 2                                                                          | Yes |
|               | 2332   | FMR1         | fragile X mental retardation 1                                                                | Yes |
|               | 93986  | FOXP2        | forkhead box P2                                                                               | Yes |
|               | 2477   | FRAXA        | fragile site, folic acid type, rare, fra(X)(q27.3) A (macroorchidism, mental retardation)     | No  |
|               | 2481   | FRAXE        | fragile site, folic acid type, rare, fra(X)(q28) E                                            | No  |
|               | 2482   | FRAXF        | fragile site, folic acid type, rare, fra(X)(q28) F                                            | No  |
|               | 2555   | GABRA2       | gamma-aminobutyric acid (GABA) A receptor, alpha 2                                            | No  |
|               | 2557   | GABRA4       | gamma-aminobutyric acid (GABA) A receptor, alpha 4                                            | Yes |
|               | 2558   | GABRA5       | gamma-aminobutyric acid (GABA) A receptor, alpha 5                                            | No  |
|               | 2562   | GABRB3       | gamma-aminobutyric acid (GABA) A receptor, beta 3                                             | Yes |
|               | 2565   | GABRG1       | gamma-aminobutyric acid (GABA) A receptor, gamma 1                                            | No  |
|               | 2567   | GABRG3       | gamma-aminobutyric acid (GABA) A receptor, gamma 3                                            | Yes |
|               | 2739   | GLO1         | glyoxalase I                                                                                  | No  |
|               | 2898   | GRIK2        | glutamate receptor, ionotropic, kainate 2                                                     | Yes |
|               | 2918   | GRM8         | glutamate receptor, metabotropic 8                                                            | Yes |
|               | 2925   | GRPR         | gastrin-releasing peptide receptor                                                            | Yes |
|               | 3123   | HLA-DRB1     | major histocompatibility complex, class II, DR beta 1                                         | Yes |
|               | 3198   | HOXA1        | homeobox A1                                                                                   | Yes |
|               | 3265   | HRAS         | v-Ha-ras Harvey rat sarcoma viral oncogene homolog                                            | Yes |
|               | 3356   | HTR2A        | 5-hydroxytryptamine (serotonin) receptor 2A                                                   | Yes |
|               | 4128   | MAOA         | monoamine oxidase A                                                                           | No  |
|               | 4204   | MECP2        | methyl CpG binding protein 2 (Rett syndrome)                                                  | Yes |
|               | 9968   | MED12        | mediator complex subunit 12                                                                   | Yes |
|               | 4763   | NF1          | neurofibromin 1 (neurofibromatosis, von Recklinghausen disease, Watson disease)               | Yes |
|               | 54413  | NLGN3        | neuroligin 3                                                                                  | Yes |
|               | 57502  | NLGN4X       | neuroligin 4, X-linked                                                                        | Yes |
|               | 4974   | OMG          | oligodendrocyte myelin glycoprotein                                                           | Yes |
|               | 5021   | OXTN         | oxytocin receptor                                                                             | Yes |
|               | 5728   | PTEN         | phosphatase and tensin homolog (mutated in multiple advanced cancers 1)                       | Yes |
|               | 5803   | PTPRZ1       | protein tyrosine phosphatase, receptor-type, Z polypeptide 1                                  | Yes |
|               | 5649   | RELN         | reelin                                                                                        | Yes |
|               | 5054   | SERPINE1     | serpin peptidase inhibitor, clade E (nexin, plasminogen activator inhibitor type 1), member 1 | Yes |
|               | 8604   | SLC25A12     | solute carrier family 25 (mitochondrial carrier, Aralar), member 12                           | Yes |

|                       |        |          |                                                                                                                                |     |
|-----------------------|--------|----------|--------------------------------------------------------------------------------------------------------------------------------|-----|
|                       | 6532   | SLC6A4   | solute carrier family 6 (neurotransmitter transporter, serotonin), member 4                                                    | Yes |
|                       | 7054   | TH       | tyrosine hydroxylase                                                                                                           | Yes |
|                       | 121278 | TPH2     | tryptophan hydroxylase 2                                                                                                       | No  |
|                       | 7472   | WNT2     | wingless-type MMTV integration site family member 2                                                                            | Yes |
| <b>Lymphoma</b>       | 1636   | ACE      | angiotensin I converting enzyme (peptidyl-dipeptidase A) 1                                                                     | Yes |
|                       | 9370   | ADIPOQ   | adiponectin, C1Q and collagen domain containing                                                                                | Yes |
|                       | 596    | BCL2     | B-cell CLL/lymphoma 2                                                                                                          | Yes |
|                       | 604    | BCL6     | B-cell CLL/lymphoma 6 (zinc finger protein 51)                                                                                 | Yes |
|                       | 1026   | CDKN1A   | cyclin-dependent kinase inhibitor 1A (p21, Cip1)                                                                               | Yes |
|                       | 1312   | COMT     | catechol-O-methyltransferase                                                                                                   | Yes |
|                       | 1493   | CTLA4    | cytotoxic T-lymphocyte-associated protein 4                                                                                    | Yes |
|                       | 1586   | CYP17A1  | cytochrome P450, family 17, subfamily A, polypeptide 1                                                                         | Yes |
|                       | 1543   | CYP1A1   | cytochrome P450, family 1, subfamily A, polypeptide 1                                                                          | Yes |
|                       | 1571   | CYP2E1   | cytochrome P450, family 2, subfamily E, polypeptide 1                                                                          | Yes |
|                       | 1906   | EDN1     | endothelin 1                                                                                                                   | Yes |
|                       | 2052   | EPHX1    | epoxide hydrolase 1, microsomal (xenobiotic)                                                                                   | No  |
|                       | 2214   | FCGR3A   | Fc fragment of IgG, low affinity IIIa, receptor (CD16a)                                                                        | Yes |
|                       | 2944   | GSTM1    | glutathione S-transferase M1                                                                                                   | Yes |
|                       | 2950   | GSTP1    | glutathione S-transferase pi                                                                                                   | Yes |
|                       | 2952   | GSTT1    | glutathione S-transferase theta 1                                                                                              | No  |
|                       | 3105   | HLA-A    | major histocompatibility complex, class I, A                                                                                   | Yes |
|                       | 3106   | HLA-B    | major histocompatibility complex, class I, B                                                                                   | Yes |
|                       | 3107   | HLA-C    | major histocompatibility complex, class I, C                                                                                   | Yes |
|                       | 3115   | HLA-DPB1 | major histocompatibility complex, class II, DP beta 1                                                                          | Yes |
|                       | 3117   | HLA-DQA1 | major histocompatibility complex, class II, DQ alpha 1                                                                         | No  |
|                       | 3119   | HLA-DQB1 | major histocompatibility complex, class II, DQ beta 1                                                                          | Yes |
|                       | 3123   | HLA-DRB1 | major histocompatibility complex, class II, DR beta 1                                                                          | Yes |
|                       | 3553   | IL1B     | interleukin 1, beta                                                                                                            | Yes |
|                       | 3952   | LEP      | leptin                                                                                                                         | Yes |
|                       | 3953   | LEPR     | leptin receptor                                                                                                                | Yes |
|                       | 4524   | MTHFR    | 5,10-methylenetetrahydrofolate reductase (NADPH)                                                                               | Yes |
|                       | 4548   | MTR      | 5-methyltetrahydrofolate-homocysteine methyltransferase                                                                        | Yes |
|                       | 4609   | MYC      | v-myc myelocytomatosis viral oncogene homolog (avian)                                                                          | Yes |
|                       | 9      | NAT1     | N-acetyltransferase 1 (arylamine N-acetyltransferase)                                                                          | Yes |
|                       | 10     | NAT2     | N-acetyltransferase 2 (arylamine N-acetyltransferase)                                                                          | No  |
|                       | 1728   | NQO1     | NAD(P)H dehydrogenase, quinone 1                                                                                               | Yes |
|                       | 5617   | PRL      | prolactin                                                                                                                      | Yes |
|                       | 5981   | RFC1     | replication factor C (activator 1) 1, 145kDa                                                                                   | Yes |
|                       | 6470   | SHMT1    | serine hydroxymethyltransferase 1 (soluble)                                                                                    | Yes |
|                       | 7099   | TLR4     | toll-like receptor 4                                                                                                           | Yes |
|                       | 7124   | TNF      | tumor necrosis factor (TNF superfamily, member 2)                                                                              | Yes |
|                       | 7132   | TNFRSF1A | tumor necrosis factor receptor superfamily, member 1A                                                                          | Yes |
|                       | 7133   | TNFRSF1B | tumor necrosis factor receptor superfamily, member 1B                                                                          | Yes |
|                       | 7153   | TOP2A    | topoisomerase (DNA) II alpha 170kDa                                                                                            | Yes |
|                       | 7157   | TP53     | tumor protein p53                                                                                                              | Yes |
|                       | 7298   | TYMS     | thymidylate synthetase                                                                                                         | Yes |
| <b>Osteoarthritis</b> | 9508   | ADAMTS3  | ADAM metalloproteinase with thrombospondin type 1 motif, 3                                                                     | No  |
|                       | 176    | ACAN     | aggrecan                                                                                                                       | Yes |
|                       | 367    | AR       | androgen receptor (dihydrotestosterone receptor; testicular feminization; spinal and bulbar muscular atrophy; Kennedy disease) | Yes |
|                       | 54829  | ASPN     | asporin                                                                                                                        | No  |
|                       | 653    | BMP5     | bone morphogenetic protein 5                                                                                                   | Yes |
|                       | 801    | CALM1    | calmodulin 1 (phosphorylase kinase, delta)                                                                                     | Yes |
|                       | 1301   | COL11A1  | collagen, type XI, alpha 1                                                                                                     | Yes |
|                       | 1302   | COL11A2  | collagen, type XI, alpha 2                                                                                                     | Yes |
|                       | 1277   | COL1A1   | collagen, type I, alpha 1                                                                                                      | Yes |
|                       | 1280   | COL2A1   | collagen, type II, alpha 1                                                                                                     | Yes |
|                       | 1297   | COL9A1   | collagen, type IX, alpha 1                                                                                                     | Yes |
|                       | 1298   | COL9A2   | collagen, type IX, alpha 2                                                                                                     | Yes |
|                       | 1299   | COL9A3   | collagen, type IX, alpha 3                                                                                                     | Yes |
|                       | 1311   | COMP     | cartilage oligomeric matrix protein                                                                                            | Yes |
|                       | 5167   | ENPP1    | ectonucleotide pyrophosphatase/phosphodiesterase 1                                                                             | Yes |
|                       | 2099   | ESR1     | estrogen receptor 1                                                                                                            | Yes |

|                            |        |          |                                                                                               |     |
|----------------------------|--------|----------|-----------------------------------------------------------------------------------------------|-----|
|                            | 2100   | ESR2     | estrogen receptor 2 (ER beta)                                                                 | Yes |
|                            | 2487   | FRZB     | frizzled-related protein                                                                      | No  |
|                            | 1404   | HAPLN1   | hyaluronan and proteoglycan link protein 1                                                    | Yes |
|                            | 3117   | HLA-DQA1 | major histocompatibility complex, class II, DQ alpha 1                                        | No  |
|                            | 3119   | HLA-DQB1 | major histocompatibility complex, class II, DQ beta 1                                         | Yes |
|                            | 3123   | HLA-DRB1 | major histocompatibility complex, class II, DR beta 1                                         | Yes |
|                            | 3479   | IGF1     | insulin-like growth factor 1 (somatomedin C)                                                  | Yes |
|                            | 3490   | IGFBP7   | insulin-like growth factor binding protein 7                                                  | Yes |
|                            | 3552   | IL1A     | interleukin 1, alpha                                                                          | Yes |
|                            | 3553   | IL1B     | interleukin 1, beta                                                                           | Yes |
|                            | 3554   | IL1R1    | interleukin 1 receptor, type I                                                                | Yes |
|                            | 3566   | IL4R     | interleukin 4 receptor                                                                        | Yes |
|                            | 3576   | IL8      | interleukin 8                                                                                 | Yes |
|                            | 4041   | LRP5     | low density lipoprotein receptor-related protein 5                                            | Yes |
|                            | 4146   | MATN1    | matrilin 1, cartilage matrix protein                                                          | Yes |
|                            | 4148   | MATN3    | matrilin 3                                                                                    | Yes |
|                            | 4313   | MMP2     | matrix metalloproteinase 2 (gelatinase A, 72kDa gelatinase, 72kDa type IV collagenase)        | Yes |
|                            | 9060   | PAPSS2   | 3'-phosphoadenosine 5'-phosphosulfate synthase 2                                              | Yes |
|                            | 12     | SERPINA3 | serpin peptidase inhibitor, clade A (alpha-1 antiproteinase, antitrypsin), member 3           | Yes |
|                            | 1836   | SLC26A2  | solute carrier family 26 (sulfate transporter), member 2                                      | No  |
|                            | 7124   | TNF      | tumor necrosis factor (TNF superfamily, member 2)                                             | Yes |
|                            | 7130   | TNFAIP6  | tumor necrosis factor, alpha-induced protein 6                                                | Yes |
|                            | 7132   | TNFRSF1A | tumor necrosis factor receptor superfamily, member 1A                                         | Yes |
|                            | 7133   | TNFRSF1B | tumor necrosis factor receptor superfamily, member 1B                                         | Yes |
|                            | 7421   | VDR      | vitamin D (1,25-dihydroxyvitamin D3) receptor                                                 | Yes |
| <b>Myocardial ischemia</b> | 19     | ABCA1    | ATP-binding cassette, sub-family A (ABC1), member 1                                           | Yes |
|                            | 1636   | ACE      | angiotensin I converting enzyme (peptidyl-dipeptidase A) 1                                    | Yes |
|                            | 177    | AGER     | advanced glycosylation end product-specific receptor                                          | Yes |
|                            | 183    | AGT      | angiotensinogen (serpin peptidase inhibitor, clade A, member 8)                               | Yes |
|                            | 335    | APOA1    | apolipoprotein A-I                                                                            | Yes |
|                            | 116519 | APOA5    | apolipoprotein A-V                                                                            | No  |
|                            | 338    | APOB     | apolipoprotein B (including Aq(x) antigen)                                                    | Yes |
|                            | 348    | APOE     | apolipoprotein E                                                                              | Yes |
|                            | 1071   | CETP     | cholesteryl ester transfer protein, plasma                                                    | Yes |
|                            | 2162   | F13A1    | coagulation factor XIII, A1 polypeptide                                                       | Yes |
|                            | 2153   | F5       | coagulation factor V (proaccelerin, labile factor)                                            | Yes |
|                            | 2155   | F7       | coagulation factor VII (serum prothrombin conversion accelerator)                             | Yes |
|                            | 2244   | FGB      | fibrinogen beta chain                                                                         | Yes |
|                            | 2811   | GP1BA    | glycoprotein Ib (platelet), alpha polypeptide                                                 | Yes |
|                            | 3077   | HFE      | hemochromatosis                                                                               | Yes |
|                            | 3091   | HIF1A    | hypoxia-inducible factor 1, alpha subunit (basic helix-loop-helix transcription factor)       | Yes |
|                            | 3162   | HMOX1    | heme oxygenase (decycling) 1                                                                  | Yes |
|                            | 3673   | ITGA2    | integrin, alpha 2 (CD49B, alpha 2 subunit of VLA-2 receptor)                                  | Yes |
|                            | 3690   | ITGB3    | integrin, beta 3 (platelet glycoprotein IIIa, antigen CD61)                                   | Yes |
|                            | 3779   | KCNMB1   | potassium large conductance calcium-activated channel, subfamily M, beta member 1             | Yes |
|                            | 4018   | LPA      | lipoprotein, Lp(a)                                                                            | Yes |
|                            | 4023   | LPL      | lipoprotein lipase                                                                            | Yes |
|                            | 4314   | MMP3     | matrix metalloproteinase 3 (stromelysin 1, progelatinase)                                     | Yes |
|                            | 4524   | MTHFR    | 5,10-methylenetetrahydrofolate reductase (NADPH)                                              | Yes |
|                            | 4846   | NOS3     | nitric oxide synthase 3 (endothelial cell)                                                    | Yes |
|                            | 64805  | P2RY12   | purinergic receptor P2Y, G-protein coupled, 12                                                | Yes |
|                            | 5175   | PECAM1   | platelet/endothelial cell adhesion molecule (CD31 antigen)                                    | Yes |
|                            | 5444   | PON1     | paraoxonase 1                                                                                 | Yes |
|                            | 5445   | PON2     | paraoxonase 2                                                                                 | Yes |
|                            | 5446   | PON3     | paraoxonase 3                                                                                 | Yes |
|                            | 5465   | PPARA    | peroxisome proliferator-activated receptor alpha                                              | Yes |
|                            | 5468   | PPARG    | peroxisome proliferator-activated receptor gamma                                              | Yes |
|                            | 5891   | RAGE     | renal tumor antigen                                                                           | Yes |
|                            | 6404   | SELPLG   | selectin P ligand                                                                             | Yes |
|                            | 5265   | SERPINA1 | serpin peptidase inhibitor, clade A (alpha-1 antiproteinase, antitrypsin), member 1           | Yes |
|                            | 5054   | SERPINE1 | serpin peptidase inhibitor, clade E (nexin, plasminogen activator inhibitor type 1), member 1 | Yes |
|                            | 7058   | THBS2    | thrombospondin 2                                                                              | Yes |
|                            | 7060   | THBS4    | thrombospondin 4                                                                              | No  |

|                     |       |                                                                        |                                                                                                                                          |     |
|---------------------|-------|------------------------------------------------------------------------|------------------------------------------------------------------------------------------------------------------------------------------|-----|
|                     | 57761 | TRIB3                                                                  | tribbles homolog 3 (Drosophila)                                                                                                          | Yes |
| Neural tube defects | 8854  | ALDH1A2                                                                | aldehyde dehydrogenase 1 family, member A2                                                                                               | No  |
|                     | 328   | APEX1                                                                  | APEX nuclease (multifunctional DNA repair enzyme) 1                                                                                      | Yes |
|                     | 635   | BHMT                                                                   | betaine-homocysteine methyltransferase                                                                                                   | No  |
|                     | 23743 | BHMT2                                                                  | betaine-homocysteine methyltransferase 2                                                                                                 | No  |
|                     | 652   | BMP4                                                                   | bone morphogenetic protein 4                                                                                                             | Yes |
|                     | 875   | CBS                                                                    | cystathionine-beta-synthase                                                                                                              | Yes |
|                     | 1381  | CRABP1                                                                 | cellular retinoic acid binding protein 1                                                                                                 | No  |
|                     | 1382  | CRABP2                                                                 | cellular retinoic acid binding protein 2                                                                                                 | Yes |
|                     | 6372  | CXCL6                                                                  | chemokine (C-X-C motif) ligand 6 (granulocyte chemotactic protein 2)                                                                     | Yes |
|                     | 1592  | CYP26A1                                                                | cytochrome P450, family 26, subfamily A, polypeptide 1                                                                                   | No  |
|                     | 56603 | CYP26B1                                                                | cytochrome P450, family 26, subfamily B, polypeptide 1                                                                                   | No  |
|                     | 1806  | DPYD                                                                   | dihydropyrimidine dehydrogenase                                                                                                          | No  |
|                     | 2068  | ERCC2                                                                  | excision repair cross-complementing rodent repair deficiency, complementation group 2 (xeroderma pigmentosum D)                          | Yes |
|                     | 2346  | FOLH1                                                                  | folate hydrolase (prostate-specific membrane antigen) 1                                                                                  | No  |
|                     | 2350  | FOLR2                                                                  | folate receptor 2 (fetal)                                                                                                                | No  |
|                     | 4397  | MS                                                                     | multiple sclerosis                                                                                                                       | No  |
|                     | 4522  | MTHFD1                                                                 | methylenetetrahydrofolate dehydrogenase (NADP+ dependent) 1, methylenetetrahydrofolate cyclohydrolase, formyltetrahydrofolate synthetase | Yes |
|                     | 4524  | MTHFR                                                                  | 5,10-methylenetetrahydrofolate reductase (NADPH)                                                                                         | Yes |
|                     | 4548  | MTR                                                                    | 5-methyltetrahydrofolate-homocysteine methyltransferase                                                                                  | Yes |
|                     | 4552  | MTRR                                                                   | 5-methyltetrahydrofolate-homocysteine methyltransferase reductase                                                                        | No  |
|                     | 4594  | MUT                                                                    | methylmalonyl Coenzyme A mutase                                                                                                          | No  |
|                     | 9241  | NOG                                                                    | noggin                                                                                                                                   | Yes |
|                     | 4968  | OGG1                                                                   | 8-oxoquinine DNA glycosylase                                                                                                             | Yes |
|                     | 5110  | PCMT1                                                                  | protein-L-isoaspartate (D-aspartate) O-methyltransferase                                                                                 | Yes |
|                     | 5156  | PDGFRA                                                                 | platelet-derived growth factor receptor, alpha polypeptide                                                                               | Yes |
| 5981                | RFC1  | replication factor C (activator 1) 1, 145kDa                           | Yes                                                                                                                                      |     |
| 6470                | SHMT1 | serine hydroxymethyltransferase 1 (soluble)                            | Yes                                                                                                                                      |     |
| 6472                | SHMT2 | serine hydroxymethyltransferase 2 (mitochondrial)                      | Yes                                                                                                                                      |     |
| 6947                | TCN1  | transcobalamin I (vitamin B12 binding protein, R binder family)        | No                                                                                                                                       |     |
| 6948                | TCN2  | transcobalamin II; macrocytic anemia                                   | No                                                                                                                                       |     |
| 7012                | TERC  | telomerase RNA component                                               | No                                                                                                                                       |     |
| 7298                | TYMS  | thymidylate synthetase                                                 | Yes                                                                                                                                      |     |
| 7351                | UCP2  | uncoupling protein 2 (mitochondrial, proton carrier)                   | Yes                                                                                                                                      |     |
| 7515                | XRCC1 | X-ray repair complementing defective repair in Chinese hamster cells 1 | Yes                                                                                                                                      |     |
| 7517                | XRCC3 | X-ray repair complementing defective repair in Chinese hamster cells 3 | Yes                                                                                                                                      |     |
| 7545                | ZIC1  | Zic family member 1 (odd-paired homolog, Drosophila)                   | Yes                                                                                                                                      |     |
| 7546                | ZIC2  | Zic family member 2 (odd-paired homolog, Drosophila)                   | Yes                                                                                                                                      |     |
| 7547                | ZIC3  | Zic family member 3 heterotaxy 1 (odd-paired homolog, Drosophila)      | No                                                                                                                                       |     |
| Cervical carcinoma  | 595   | CCND1                                                                  | cyclin D1                                                                                                                                | Yes |
|                     | 1231  | CCR2                                                                   | chemokine (C-C motif) receptor 2                                                                                                         | Yes |
|                     | 1026  | CDKN1A                                                                 | cyclin-dependent kinase inhibitor 1A (p21, Cip1)                                                                                         | Yes |
|                     | 1571  | CYP2E1                                                                 | cytochrome P450, family 2, subfamily E, polypeptide 1                                                                                    | Yes |
|                     | 2052  | EPHX1                                                                  | epoxide hydrolase 1, microsomal (xenobiotic)                                                                                             | No  |
|                     | 355   | FAS                                                                    | Fas (TNF receptor superfamily, member 6)                                                                                                 | Yes |
|                     | 356   | FASLG                                                                  | Fas ligand (TNF superfamily, member 6)                                                                                                   | Yes |
|                     | 2272  | FHIT                                                                   | fragile histidine triad gene                                                                                                             | Yes |
|                     | 2944  | GSTM1                                                                  | glutathione S-transferase M1                                                                                                             | Yes |
|                     | 3105  | HLA-A                                                                  | major histocompatibility complex, class I, A                                                                                             | Yes |
|                     | 3115  | HLA-DPB1                                                               | major histocompatibility complex, class II, DP beta 1                                                                                    | Yes |
|                     | 3117  | HLA-DQA1                                                               | major histocompatibility complex, class II, DQ alpha 1                                                                                   | No  |
|                     | 3119  | HLA-DQB1                                                               | major histocompatibility complex, class II, DQ beta 1                                                                                    | Yes |
|                     | 3123  | HLA-DRB1                                                               | major histocompatibility complex, class II, DR beta 1                                                                                    | Yes |
|                     | 3265  | HRAS                                                                   | v-Ha-ras Harvey rat sarcoma viral oncogene homolog                                                                                       | Yes |
|                     | 3451  | IFNA17                                                                 | interferon, alpha 17                                                                                                                     | No  |
|                     | 3458  | IFNG                                                                   | interferon, gamma                                                                                                                        | Yes |
|                     | 3659  | IRF1                                                                   | interferon regulatory factor 1                                                                                                           | Yes |
|                     | 3802  | KIR2DL1                                                                | killer cell immunoglobulin-like receptor, two domains, long cytoplasmic tail, 1                                                          | Yes |
|                     | 3803  | KIR2DL2                                                                | killer cell immunoglobulin-like receptor, two domains, long cytoplasmic tail, 2                                                          | Yes |
|                     | 3804  | KIR2DL3                                                                | killer cell immunoglobulin-like receptor, two domains, long cytoplasmic tail, 3                                                          | Yes |
|                     | 3805  | KIR2DL4                                                                | killer cell immunoglobulin-like receptor, two domains, long cytoplasmic tail, 4                                                          | Yes |
|                     | 3809  | KIR2DS4                                                                | killer cell immunoglobulin-like receptor, two domains, short cytoplasmic tail, 4                                                         | Yes |

|                        |        |          |                                                                                     |     |
|------------------------|--------|----------|-------------------------------------------------------------------------------------|-----|
|                        | 3811   | KIR3DL1  | killer cell immunoglobulin-like receptor, three domains, long cytoplasmic tail, 1   | Yes |
|                        | 3812   | KIR3DL2  | killer cell immunoglobulin-like receptor, three domains, long cytoplasmic tail, 2   | Yes |
|                        | 115653 | KIR3DL3  | killer cell immunoglobulin-like receptor, three domains, long cytoplasmic tail, 3   | No  |
|                        | 4276   | MICA     | MHC class I polypeptide-related sequence A                                          | Yes |
|                        | 4312   | MMP1     | matrix metalloproteinase 1 (interstitial collagenase)                               | Yes |
|                        | 10     | NAT2     | N-acetyltransferase 2 (arylamine N-acetyltransferase)                               | No  |
|                        | 4968   | OGG1     | 8-oxoguanine DNA glycosylase                                                        | Yes |
|                        | 6556   | SLC11A1  | solute carrier family 11 (proton-coupled divalent metal ion transporters), member 1 | No  |
|                        | 6768   | ST14     | suppression of tumorigenicity 14 (colon carcinoma)                                  | Yes |
|                        | 6890   | TAP1     | transporter 1, ATP-binding cassette, sub-family B (MDR/TAP)                         | Yes |
|                        | 9338   | TCEAL1   | transcription elongation factor A (SII)-like 1                                      | Yes |
|                        | 7124   | TNF      | tumor necrosis factor (TNF superfamily, member 2)                                   | Yes |
|                        | 7157   | TP53     | tumor protein p53                                                                   | Yes |
|                        | 7161   | TP73     | tumor protein p73                                                                   | Yes |
|                        | 7515   | XRCC1    | X-ray repair complementing defective repair in Chinese hamster cells 1              | Yes |
| <b>Epilepsy</b>        | 5243   | ABCB1    | ATP-binding cassette, sub-family B (MDR/TAP), member 1                              | No  |
|                        | 477    | ATP1A2   | ATPase, Na <sup>+</sup> /K <sup>+</sup> transporting, alpha 2 (+) polypeptide       | Yes |
|                        | 627    | BDNF     | brain-derived neurotrophic factor                                                   | Yes |
|                        | 773    | CACNA1A  | calcium channel, voltage-dependent, P/Q type, alpha 1A subunit                      | Yes |
|                        | 8912   | CACNA1H  | calcium channel, voltage-dependent, T type, alpha 1H subunit                        | Yes |
|                        | 1137   | CHRNA4   | cholinergic receptor, nicotinic, alpha 4                                            | Yes |
|                        | 1476   | CSTB     | cystatin B (stefin B)                                                               | Yes |
|                        | 1557   | CYP2C19  | cytochrome P450, family 2, subfamily C, polypeptide 19                              | Yes |
|                        | 1559   | CYP2C9   | cytochrome P450, family 2, subfamily C, polypeptide 9                               | Yes |
|                        | 1621   | DBH      | dopamine beta-hydroxylase (dopamine beta-monoxygenase)                              | No  |
|                        | 11083  | DIDO1    | death inducer-obliterator 1                                                         | Yes |
|                        | 2550   | GABBR1   | gamma-aminobutyric acid (GABA) B receptor, 1                                        | Yes |
|                        | 2558   | GABRA5   | gamma-aminobutyric acid (GABA) A receptor, alpha 5                                  | No  |
|                        | 2560   | GABRB1   | gamma-aminobutyric acid (GABA) A receptor, beta 1                                   | Yes |
|                        | 2562   | GABRB3   | gamma-aminobutyric acid (GABA) A receptor, beta 3                                   | Yes |
|                        | 2563   | GABRD    | gamma-aminobutyric acid (GABA) A receptor, delta                                    | Yes |
|                        | 2566   | GABRG2   | gamma-aminobutyric acid (GABA) A receptor, gamma 2                                  | Yes |
|                        | 2897   | GRIK1    | glutamate receptor, ionotropic, kainate 1                                           | Yes |
|                        | 3123   | HLA-DRB1 | major histocompatibility complex, class II, DR beta 1                               | Yes |
|                        | 3240   | HP       | haptoglobin                                                                         | Yes |
|                        | 3553   | IL1B     | interleukin 1, beta                                                                 | Yes |
|                        | 3766   | KCNJ10   | potassium inwardly-rectifying channel, subfamily J, member 10                       | Yes |
|                        | 3760   | KCNJ3    | potassium inwardly-rectifying channel, subfamily J, member 3                        | Yes |
|                        | 3763   | KCNJ6    | potassium inwardly-rectifying channel, subfamily J, member 6                        | Yes |
|                        | 3765   | KCNJ9    | potassium inwardly-rectifying channel, subfamily J, member 9                        | Yes |
|                        | 3785   | KCNQ2    | potassium voltage-gated channel, KQT-like subfamily, member 2                       | Yes |
|                        | 3786   | KCNQ3    | potassium voltage-gated channel, KQT-like subfamily, member 3                       | Yes |
|                        | 10656  | KHDRBS3  | KH domain containing, RNA binding, signal transduction associated 3                 | Yes |
|                        | 163175 | LGI4     | leucine-rich repeat LGI family, member 4                                            | No  |
|                        | 4128   | MAOA     | monoamine oxidase A                                                                 | No  |
|                        | 4988   | OPRM1    | opioid receptor, mu 1                                                               | Yes |
|                        | 5080   | PAX6     | paired box 6                                                                        | Yes |
|                        | 5173   | PDYN     | prodynorphin                                                                        | No  |
|                        | 6323   | SCN1A    | sodium channel, voltage-gated, type I, alpha subunit                                | No  |
|                        | 6324   | SCN1B    | sodium channel, voltage-gated, type I, beta                                         | Yes |
|                        | 6508   | SLC4A3   | solute carrier family 4, anion exchanger, member 3                                  | Yes |
| <b>Grave's disease</b> | 720    | C4A      | complement component 4A (Rodgers blood group)                                       | Yes |
|                        | 958    | CD40     | CD40 molecule, TNF receptor superfamily member 5                                    | Yes |
|                        | 959    | CD40LG   | CD40 ligand (TNF superfamily, member 5, hyper-IgM syndrome)                         | Yes |
|                        | 1493   | CTLA4    | cytotoxic T-lymphocyte-associated protein 4                                         | Yes |
|                        | 2099   | ESR1     | estrogen receptor 1                                                                 | Yes |
|                        | 2100   | ESR2     | estrogen receptor 2 (ER beta)                                                       | Yes |
|                        | 356    | FASLG    | Fas ligand (TNF superfamily, member 6)                                              | Yes |
|                        | 2638   | GC       | group-specific component (vitamin D binding protein)                                | Yes |
|                        | 3106   | HLA-B    | major histocompatibility complex, class I, B                                        | Yes |
|                        | 3117   | HLA-DQA1 | major histocompatibility complex, class II, DQ alpha 1                              | No  |
|                        | 3119   | HLA-DQB1 | major histocompatibility complex, class II, DQ beta 1                               | Yes |
|                        | 3123   | HLA-DRB1 | major histocompatibility complex, class II, DR beta 1                               | Yes |

|                                         |        |          |                                                                                                           |     |
|-----------------------------------------|--------|----------|-----------------------------------------------------------------------------------------------------------|-----|
|                                         | 3383   | ICAM1    | intercellular adhesion molecule 1 (CD54), human rhinovirus receptor                                       | Yes |
|                                         | 3458   | IFNG     | interferon, gamma                                                                                         | Yes |
|                                         | 3593   | IL12B    | interleukin 12B (natural killer cell stimulatory factor 2, cytotoxic lymphocyte maturation factor 2, p40) | Yes |
|                                         | 3596   | IL13     | interleukin 13                                                                                            | Yes |
|                                         | 3552   | IL1A     | interleukin 1, alpha                                                                                      | Yes |
|                                         | 3557   | IL1RN    | interleukin 1 receptor antagonist                                                                         | Yes |
|                                         | 3565   | IL4      | interleukin 4                                                                                             | Yes |
|                                         | 3569   | IL6      | interleukin 6 (interferon, beta 2)                                                                        | Yes |
|                                         | 3576   | IL8      | interleukin 8                                                                                             | Yes |
|                                         | 3630   | INS      | insulin                                                                                                   | Yes |
|                                         | 3659   | IRF1     | interferon regulatory factor 1                                                                            | Yes |
|                                         | 4049   | LTA      | lymphotoxin alpha (TNF superfamily, member 1)                                                             | Yes |
|                                         | 5698   | PSMB9    | proteasome (prosome, macropain) subunit, beta type, 9 (large multifunctional peptidase 2)                 | Yes |
|                                         | 26191  | PTPN22   | protein tyrosine phosphatase, non-receptor type 22 (lymphoid)                                             | Yes |
|                                         | 117156 | SCGB3A2  | secretoglobin, family 3A, member 2                                                                        | Yes |
|                                         | 5172   | SLC26A4  | solute carrier family 26, member 4                                                                        | No  |
|                                         | 387082 | SUMO4    | SMT3 suppressor of mif two 3 homolog 4 (S. cerevisiae)                                                    | Yes |
|                                         | 6890   | TAP1     | transporter 1, ATP-binding cassette, sub-family B (MDR/TAP)                                               | Yes |
|                                         | 6891   | TAP2     | transporter 2, ATP-binding cassette, sub-family B (MDR/TAP)                                               | Yes |
|                                         | 7038   | TG       | thyroglobulin                                                                                             | Yes |
|                                         | 7068   | THRB     | thyroid hormone receptor, beta (erythroblastic leukemia viral (v-erb-a) oncogene homolog 2, avian)        | Yes |
|                                         | 7124   | TNF      | tumor necrosis factor (TNF superfamily, member 2)                                                         | Yes |
|                                         | 7253   | TSHR     | thyroid stimulating hormone receptor                                                                      | Yes |
|                                         | 7421   | VDR      | vitamin D (1,25-dihydroxyvitamin D3) receptor                                                             | Yes |
| <b>Inflammatory bowel disease (IBD)</b> | 5243   | ABCB1    | ATP-binding cassette, sub-family B (MDR/TAP), member 1                                                    | No  |
|                                         | 1636   | ACE      | angiotensin I converting enzyme (peptidyl-dipeptidase A) 1                                                | Yes |
|                                         | 324    | APC      | adenomatous polyposis coli                                                                                | Yes |
|                                         | 335    | APOA1    | apolipoprotein A-I                                                                                        | Yes |
|                                         | 64127  | NOD2     | nucleotide-binding oligomerization domain containing 2                                                    | Yes |
|                                         | 929    | CD14     | CD14 molecule                                                                                             | Yes |
|                                         | 1493   | CTLA4    | cytotoxic T-lymphocyte-associated protein 4                                                               | Yes |
|                                         | 9231   | DLG5     | discs, large homolog 5 (Drosophila)                                                                       | Yes |
|                                         | 2162   | F13A1    | coagulation factor XIII, A1 polypeptide                                                                   | Yes |
|                                         | 2165   | F13B     | coagulation factor XIII, B polypeptide                                                                    | Yes |
|                                         | 2147   | F2       | coagulation factor II (thrombin)                                                                          | Yes |
|                                         | 3113   | HLA-DPA1 | major histocompatibility complex, class II, DP alpha 1                                                    | Yes |
|                                         | 3119   | HLA-DQB1 | major histocompatibility complex, class II, DQ beta 1                                                     | Yes |
|                                         | 3123   | HLA-DRB1 | major histocompatibility complex, class II, DR beta 1                                                     | Yes |
|                                         | 3383   | ICAM1    | intercellular adhesion molecule 1 (CD54), human rhinovirus receptor                                       | Yes |
|                                         | 3458   | IFNG     | interferon, gamma                                                                                         | Yes |
|                                         | 3459   | IFNGR1   | interferon gamma receptor 1                                                                               | Yes |
|                                         | 10261  | IGSF6    | immunoglobulin superfamily, member 6                                                                      | No  |
|                                         | 3586   | IL10     | interleukin 10                                                                                            | Yes |
|                                         | 3553   | IL1B     | interleukin 1, beta                                                                                       | Yes |
|                                         | 3554   | IL1R1    | interleukin 1 receptor, type I                                                                            | Yes |
|                                         | 3557   | IL1RN    | interleukin 1 receptor antagonist                                                                         | Yes |
|                                         | 3566   | IL4R     | interleukin 4 receptor                                                                                    | Yes |
|                                         | 3567   | IL5      | interleukin 5 (colony-stimulating factor, eosinophil)                                                     | Yes |
|                                         | 3683   | ITGAL    | integrin, alpha L (antigen CD11A (p180), lymphocyte function-associated antigen 1; alpha polypeptide)     | Yes |
|                                         | 3695   | ITGB7    | integrin, beta 7                                                                                          | Yes |
|                                         | 3704   | ITPA     | inosine triphosphatase (nucleoside triphosphate pyrophosphatase)                                          | No  |
|                                         | 3998   | LMAN1    | lectin, mannose-binding, 1                                                                                | Yes |
|                                         | 4292   | MLH1     | mutL homolog 1, colon cancer, nonpolyposis type 2 (E. coli)                                               | Yes |
|                                         | 5327   | PLAT     | plasminogen activator, tissue                                                                             | Yes |
|                                         | 5743   | PTGS2    | prostaglandin-endoperoxide synthase 2 (prostaglandin G/H synthase and cyclooxygenase)                     | Yes |
|                                         | 6556   | SLC11A1  | solute carrier family 11 (proton-coupled divalent metal ion transporters), member 1                       | No  |
|                                         | 7040   | TGFB1    | transforming growth factor, beta 1                                                                        | Yes |
|                                         | 7099   | TLR4     | toll-like receptor 4                                                                                      | Yes |
|                                         | 7124   | TNF      | tumor necrosis factor (TNF superfamily, member 2)                                                         | Yes |
|                                         | 7172   | TPMT     | thiopurine S-methyltransferase                                                                            | No  |
| <b>Atherosclerosis</b>                  | 1636   | ACE      | angiotensin I converting enzyme (peptidyl-dipeptidase A) 1                                                | Yes |
|                                         | 185    | AGTR1    | angiotensin II receptor, type 1                                                                           | Yes |

|                           |       |          |                                                                                               |     |
|---------------------------|-------|----------|-----------------------------------------------------------------------------------------------|-----|
|                           | 240   | ALOX5    | arachidonate 5-lipoxygenase                                                                   | Yes |
|                           | 337   | APOA4    | apolipoprotein A-IV                                                                           | Yes |
|                           | 338   | APOB     | apolipoprotein B (including Ag(x) antigen)                                                    | Yes |
|                           | 348   | APOE     | apolipoprotein E                                                                              | Yes |
|                           | 875   | CBS      | cystathionine-beta-synthase                                                                   | Yes |
|                           | 929   | CD14     | CD14 molecule                                                                                 | Yes |
|                           | 1071  | CETP     | cholesteryl ester transfer protein, plasma                                                    | Yes |
|                           | 1215  | CMA1     | chymase 1, mast cell                                                                          | Yes |
|                           | 1524  | CX3CR1   | chemokine (C-X3-C motif) receptor 1                                                           | Yes |
|                           | 6387  | CXCL12   | chemokine (C-X-C motif) ligand 12 (stromal cell-derived factor 1)                             | Yes |
|                           | 1535  | CYBA     | cytochrome b-245, alpha polypeptide                                                           | Yes |
|                           | 1585  | CYP11B2  | cytochrome P450, family 11, subfamily B, polypeptide 2                                        | Yes |
|                           | 1571  | CYP2E1   | cytochrome P450, family 2, subfamily E, polypeptide 1                                         | Yes |
|                           | 2212  | FCGR2A   | Fc fragment of IgG, low affinity IIa, receptor (CD32)                                         | Yes |
|                           | 2944  | GSTM1    | glutathione S-transferase M1                                                                  | Yes |
|                           | 2952  | GSTT1    | glutathione S-transferase theta 1                                                             | No  |
|                           | 3077  | HFE      | hemochromatosis                                                                               | Yes |
|                           | 3569  | IL6      | interleukin 6 (interferon, beta 2)                                                            | Yes |
|                           | 3630  | INS      | insulin                                                                                       | Yes |
|                           | 4035  | LRP1     | low density lipoprotein-related protein 1 (alpha-2-macroglobulin receptor)                    | Yes |
|                           | 4322  | MMP13    | matrix metalloproteinase 13 (collagenase 3)                                                   | Yes |
|                           | 4314  | MMP3     | matrix metalloproteinase 3 (stromelysin 1, progelatinase)                                     | Yes |
|                           | 4353  | MPO      | myeloperoxidase                                                                               | No  |
|                           | 4524  | MTHFR    | 5,10-methylenetetrahydrofolate reductase (NADPH)                                              | Yes |
|                           | 4846  | NOS3     | nitric oxide synthase 3 (endothelial cell)                                                    | Yes |
|                           | 5105  | PCK1     | phosphoenolpyruvate carboxykinase 1 (soluble)                                                 | No  |
|                           | 5444  | PON1     | paraoxonase 1                                                                                 | Yes |
|                           | 5445  | PON2     | paraoxonase 2                                                                                 | Yes |
|                           | 6401  | SELE     | selectin E (endothelial adhesion molecule 1)                                                  | Yes |
|                           | 5054  | SERPINE1 | serpin peptidase inhibitor, clade E (nexin, plasminogen activator inhibitor type 1), member 1 | Yes |
|                           | 6720  | SREBF1   | sterol regulatory element binding transcription factor 1                                      | Yes |
|                           | 7099  | TLR4     | toll-like receptor 4                                                                          | Yes |
|                           | 7124  | TNF      | tumor necrosis factor (TNF superfamily, member 2)                                             | Yes |
| <b>Ulcerative colitis</b> | 5243  | ABCB1    | ATP-binding cassette, sub-family B (MDR/TAP), member 1                                        | No  |
|                           | 7919  | BAT1     | HLA-B associated transcript 1                                                                 | Yes |
|                           | 7916  | BAT2     | HLA-B associated transcript 2                                                                 | Yes |
|                           | 64127 | NOD2     | nucleotide-binding oligomerization domain containing 2                                        | Yes |
|                           | 6356  | CCL11    | chemokine (C-C motif) ligand 11                                                               | Yes |
|                           | 6369  | CCL24    | chemokine (C-C motif) ligand 24                                                               | Yes |
|                           | 10344 | CCL26    | chemokine (C-C motif) ligand 26                                                               | Yes |
|                           | 929   | CD14     | CD14 molecule                                                                                 | Yes |
|                           | 1493  | CTLA4    | cytotoxic T-lymphocyte-associated protein 4                                                   | Yes |
|                           | 3122  | HLA-DRA  | major histocompatibility complex, class II, DR alpha                                          | Yes |
|                           | 3123  | HLA-DRB1 | major histocompatibility complex, class II, DR beta 1                                         | Yes |
|                           | 3586  | IL10     | interleukin 10                                                                                | Yes |
|                           | 3589  | IL11     | interleukin 11                                                                                | Yes |
|                           | 3553  | IL1B     | interleukin 1, beta                                                                           | Yes |
|                           | 3554  | IL1R1    | interleukin 1 receptor, type I                                                                | Yes |
|                           | 3557  | IL1RN    | interleukin 1 receptor antagonist                                                             | Yes |
|                           | 3565  | IL4      | interleukin 4                                                                                 | Yes |
|                           | 3845  | KRAS     | v-Ki-ras2 Kirsten rat sarcoma viral oncogene homolog                                          | Yes |
|                           | 4049  | LTA      | lymphotoxin alpha (TNF superfamily, member 1)                                                 | Yes |
|                           | 4276  | MICA     | MHC class I polypeptide-related sequence A                                                    | Yes |
|                           | 4282  | MIF      | macrophage migration inhibitory factor (glycosylation-inhibiting factor)                      | Yes |
|                           | 4292  | MLH1     | mutL homolog 1, colon cancer, nonpolyposis type 2 (E. coli)                                   | Yes |
|                           | 4312  | MMP1     | matrix metalloproteinase 1 (interstitial collagenase)                                         | Yes |
|                           | 4314  | MMP3     | matrix metalloproteinase 3 (stromelysin 1, progelatinase)                                     | Yes |
|                           | 4584  | MUC3A    | mucin 3A, cell surface associated                                                             | No  |
|                           | 4790  | NFKB1    | nuclear factor of kappa light polypeptide gene enhancer in B-cells 1 (p105)                   | Yes |
|                           | 4795  | NFKBIL1  | nuclear factor of kappa light polypeptide gene enhancer in B-cells inhibitor-like 1           | Yes |
|                           | 4842  | NOS1     | nitric oxide synthase 1 (neuronal)                                                            | Yes |
|                           | 7941  | PLA2G7   | phospholipase A2, group VII (platelet-activating factor acetylhydrolase, plasma)              | Yes |
|                           | 7099  | TLR4     | toll-like receptor 4                                                                          | Yes |

|                              |        |         |                                                                                                                                                            |     |
|------------------------------|--------|---------|------------------------------------------------------------------------------------------------------------------------------------------------------------|-----|
|                              | 7124   | TNF     | tumor necrosis factor (TNF superfamily, member 2)                                                                                                          | Yes |
|                              | 7157   | TP53    | tumor protein p53                                                                                                                                          | Yes |
|                              | 7172   | TPMT    | thiopurine S-methyltransferase                                                                                                                             | No  |
|                              | 6955   | TRA@    | T cell receptor alpha locus                                                                                                                                | Yes |
| <b>Hypercholesterolaemia</b> | 19     | ABCA1   | ATP-binding cassette, sub-family A (ABC1), member 1                                                                                                        | Yes |
|                              | 5243   | ABCB1   | ATP-binding cassette, sub-family B (MDR/TAP), member 1                                                                                                     | No  |
|                              | 64240  | ABCG5   | ATP-binding cassette, sub-family G (WHITE), member 5 (sterolin 1)                                                                                          | Yes |
|                              | 64241  | ABCG8   | ATP-binding cassette, sub-family G (WHITE), member 8 (sterolin 2)                                                                                          | Yes |
|                              | 335    | APOA1   | apolipoprotein A-I                                                                                                                                         | Yes |
|                              | 337    | APOA4   | apolipoprotein A-IV                                                                                                                                        | Yes |
|                              | 116519 | APOA5   | apolipoprotein A-V                                                                                                                                         | No  |
|                              | 338    | APOB    | apolipoprotein B (including Ag(x) antigen)                                                                                                                 | Yes |
|                              | 345    | APOC3   | apolipoprotein C-III                                                                                                                                       | No  |
|                              | 348    | APOE    | apolipoprotein E                                                                                                                                           | Yes |
|                              | 1071   | CETP    | cholesteryl ester transfer protein, plasma                                                                                                                 | Yes |
|                              | 1535   | CYBA    | cytochrome b-245, alpha polypeptide                                                                                                                        | Yes |
|                              | 1543   | CYP1A1  | cytochrome P450, family 1, subfamily A, polypeptide 1                                                                                                      | Yes |
|                              | 1557   | CYP2C19 | cytochrome P450, family 2, subfamily C, polypeptide 19                                                                                                     | Yes |
|                              | 1559   | CYP2C9  | cytochrome P450, family 2, subfamily C, polypeptide 9                                                                                                      | Yes |
|                              | 1565   | CYP2D6  | cytochrome P450, family 2, subfamily D, polypeptide 6                                                                                                      | No  |
|                              | 1576   | CYP3A4  | cytochrome P450, family 3, subfamily A, polypeptide 4                                                                                                      | No  |
|                              | 1577   | CYP3A5  | cytochrome P450, family 3, subfamily A, polypeptide 5                                                                                                      | No  |
|                              | 1581   | CYP7A1  | cytochrome P450, family 7, subfamily A, polypeptide 1                                                                                                      | No  |
|                              | 2169   | FABP2   | fatty acid binding protein 2, intestinal                                                                                                                   | No  |
|                              | 3700   | ITIH4   | inter-alpha (globulin) inhibitor H4 (plasma Kallikrein-sensitive glycoprotein)                                                                             | No  |
|                              | 3949   | LDLR    | low density lipoprotein receptor (familial hypercholesterolemia)                                                                                           | Yes |
|                              | 3990   | LIPC    | lipase, hepatic                                                                                                                                            | Yes |
|                              | 4023   | LPL     | lipoprotein lipase                                                                                                                                         | Yes |
|                              | 10     | NAT2    | N-acetyltransferase 2 (arylamine N-acetyltransferase)                                                                                                      | No  |
|                              | 255738 | PCSK9   | proprotein convertase subtilisin/kexin type 9                                                                                                              | No  |
|                              | 5444   | PON1    | paraoxonase 1                                                                                                                                              | Yes |
|                              | 5445   | PON2    | paraoxonase 2                                                                                                                                              | Yes |
|                              | 949    | SCARB1  | scavenger receptor class B, member 1                                                                                                                       | Yes |
|                              | 6720   | SREBF1  | sterol regulatory element binding transcription factor 1                                                                                                   | Yes |
|                              | 6721   | SREBF2  | sterol regulatory element binding transcription factor 2                                                                                                   | Yes |
|                              | 7099   | TLR4    | toll-like receptor 4                                                                                                                                       | Yes |
| <b>Endometrial carcinoma</b> | 155    | ADRB3   | adrenergic, beta-3-, receptor                                                                                                                              | Yes |
|                              | 367    | AR      | androgen receptor (dihydrotestosterone receptor; testicular feminization; spinal and bulbar muscular atrophy; Kennedy disease)                             | Yes |
|                              | 673    | BRAF    | v-raf murine sarcoma viral oncogene homolog B1                                                                                                             | Yes |
|                              | 672    | BRCA1   | breast cancer 1, early onset                                                                                                                               | Yes |
|                              | 595    | CCND1   | cyclin D1                                                                                                                                                  | Yes |
|                              | 1312   | COMT    | catechol-O-methyltransferase                                                                                                                               | Yes |
|                              | 1586   | CYP17A1 | cytochrome P450, family 17, subfamily A, polypeptide 1                                                                                                     | Yes |
|                              | 1588   | CYP19A1 | cytochrome P450, family 19, subfamily A, polypeptide 1                                                                                                     | Yes |
|                              | 1543   | CYP1A1  | cytochrome P450, family 1, subfamily A, polypeptide 1                                                                                                      | Yes |
|                              | 1544   | CYP1A2  | cytochrome P450, family 1, subfamily A, polypeptide 2                                                                                                      | Yes |
|                              | 1545   | CYP1B1  | cytochrome P450, family 1, subfamily B, polypeptide 1                                                                                                      | Yes |
|                              | 2067   | ERCC1   | excision repair cross-complementing rodent repair deficiency, complementation group 1 (includes overlapping antisense sequence)                            | Yes |
|                              | 2068   | ERCC2   | excision repair cross-complementing rodent repair deficiency, complementation group 2 (xeroderma pigmentosum D)                                            | Yes |
|                              | 2072   | ERCC4   | excision repair cross-complementing rodent repair deficiency, complementation group 4                                                                      | Yes |
|                              | 2073   | ERCC5   | excision repair cross-complementing rodent repair deficiency, complementation group 5 (xeroderma pigmentosum, complementation group G (Cockayne syndrome)) | Yes |
|                              | 2099   | ESR1    | estrogen receptor 1                                                                                                                                        | Yes |
|                              | 2100   | ESR2    | estrogen receptor 2 (ER beta)                                                                                                                              | Yes |
|                              | 3845   | KRAS    | v-Ki-ras2 Kirsten rat sarcoma viral oncogene homolog                                                                                                       | Yes |
|                              | 4292   | MLH1    | mutL homolog 1, colon cancer, nonpolyposis type 2 (E. coli)                                                                                                | Yes |
|                              | 4436   | MSH2    | mutS homolog 2, colon cancer, nonpolyposis type 1 (E. coli)                                                                                                | Yes |
|                              | 2956   | MSH6    | mutS homolog 6 (E. coli)                                                                                                                                   | Yes |
|                              | 4582   | MUC1    | mucin 1, cell surface associated                                                                                                                           | Yes |

|                     |        |          |                                                                                                                                          |     |
|---------------------|--------|----------|------------------------------------------------------------------------------------------------------------------------------------------|-----|
|                     | 5063   | PAK3     | p21 (CDKN1A)-activated kinase 3                                                                                                          | Yes |
|                     | 5241   | PGR      | progesterone receptor                                                                                                                    | Yes |
|                     | 5728   | PTEN     | phosphatase and tensin homolog (mutated in multiple advanced cancers 1)                                                                  | Yes |
|                     | 7157   | TP53     | tumor protein p53                                                                                                                        | Yes |
|                     | 7161   | TP73     | tumor protein p73                                                                                                                        | Yes |
|                     | 54658  | UGT1A1   | UDP glucuronosyltransferase 1 family, polypeptide A1                                                                                     | No  |
|                     | 7507   | XPA      | xeroderma pigmentosum, complementation group A                                                                                           | Yes |
|                     | 7508   | XPC      | xeroderma pigmentosum, complementation group C                                                                                           | Yes |
|                     | 7515   | XRCC1    | X-ray repair complementing defective repair in Chinese hamster cells 1                                                                   | Yes |
|                     | 7517   | XRCC3    | X-ray repair complementing defective repair in Chinese hamster cells 3                                                                   | Yes |
|                     | 7520   | XRCC5    | X-ray repair complementing defective repair in Chinese hamster cells 5 (double-strand-break rejoining; Ku autoantigen, 80kDa)            | Yes |
| <b>Migraine</b>     | 367    | AR       | androgen receptor (dihydrotestosterone receptor; testicular feminization; spinal and bulbar muscular atrophy; Kennedy disease)           | Yes |
|                     | 773    | CACNA1A  | calcium channel, voltage-dependent, P/Q type, alpha 1A subunit                                                                           | Yes |
|                     | 1493   | CTLA4    | cytotoxic T-lymphocyte-associated protein 4                                                                                              | Yes |
|                     | 1621   | DBH      | dopamine beta-hydroxylase (dopamine beta-monoxygenase)                                                                                   | No  |
|                     | 11083  | DIDO1    | death inducer-obliterator 1                                                                                                              | Yes |
|                     | 1812   | DRD1     | dopamine receptor D1                                                                                                                     | Yes |
|                     | 1814   | DRD3     | dopamine receptor D3                                                                                                                     | Yes |
|                     | 1815   | DRD4     | dopamine receptor D4                                                                                                                     | Yes |
|                     | 1816   | DRD5     | dopamine receptor D5                                                                                                                     | Yes |
|                     | 1909   | EDNRA    | endothelin receptor type A                                                                                                               | Yes |
|                     | 1910   | EDNRB    | endothelin receptor type B                                                                                                               | Yes |
|                     | 114327 | EFHC1    | EF-hand domain (C-terminal) containing 1                                                                                                 | Yes |
|                     | 2099   | ESR1     | estrogen receptor 1                                                                                                                      | Yes |
|                     | 2157   | F8       | coagulation factor VIII, procoagulant component (hemophilia A)                                                                           | Yes |
|                     | 3356   | HTR2A    | 5-hydroxytryptamine (serotonin) receptor 2A                                                                                              | Yes |
|                     | 3552   | IL1A     | interleukin 1, alpha                                                                                                                     | Yes |
|                     | 3643   | INSR     | insulin receptor                                                                                                                         | Yes |
|                     | 3782   | KCNN3    | potassium intermediate/small conductance calcium-activated channel, subfamily N, member 3                                                | No  |
|                     | 192115 | MA       | Migraine with aura, susceptibility to                                                                                                    | No  |
|                     | 4128   | MAOA     | monoamine oxidase A                                                                                                                      | No  |
|                     | 4129   | MAOB     | monoamine oxidase B                                                                                                                      | No  |
|                     | 4224   | MEP1A    | mepirin A, alpha (PABA peptide hydrolase)                                                                                                | Yes |
|                     | 4522   | MTHFD1   | methylenetetrahydrofolate dehydrogenase (NADP+ dependent) 1, methylenetetrahydrofolate cyclohydrolase, formyltetrahydrofolate synthetase | Yes |
|                     | 4524   | MTHFR    | 5,10-methylenetetrahydrofolate reductase (NADPH)                                                                                         | Yes |
|                     | 4842   | NOS1     | nitric oxide synthase 1 (neuronal)                                                                                                       | Yes |
|                     | 4843   | NOS2A    | nitric oxide synthase 2A (inducible, hepatocytes)                                                                                        | Yes |
|                     | 5241   | PGR      | progesterone receptor                                                                                                                    | Yes |
|                     | 6005   | RHAG     | Rh-associated glycoprotein                                                                                                               | Yes |
|                     | 9481   | SLC25A27 | solute carrier family 25, member 27                                                                                                      | No  |
|                     | 6532   | SLC6A4   | solute carrier family 6 (neurotransmitter transporter, serotonin), member 4                                                              | Yes |
|                     | 7124   | TNF      | tumor necrosis factor (TNF superfamily, member 2)                                                                                        | Yes |
|                     | 27242  | TNFRSF21 | tumor necrosis factor receptor superfamily, member 21                                                                                    | Yes |
|                     | 7298   | TYMS     | thymidylate synthetase                                                                                                                   | Yes |
| <b>Pancreatitis</b> | 125    | ADH1B    | alcohol dehydrogenase 1B (class I), beta polypeptide                                                                                     | No  |
|                     | 217    | ALDH2    | aldehyde dehydrogenase 2 family (mitochondrial)                                                                                          | Yes |
|                     | 847    | CAT      | catalase                                                                                                                                 | Yes |
|                     | 929    | CD14     | CD14 molecule                                                                                                                            | Yes |
|                     | 1080   | CFTR     | cystic fibrosis transmembrane conductance regulator (ATP-binding cassette sub-family C, member 7)                                        | Yes |
|                     | 2944   | GSTM1    | glutathione S-transferase M1                                                                                                             | Yes |
|                     | 2947   | GSTM3    | glutathione S-transferase M3 (brain)                                                                                                     | Yes |
|                     | 2950   | GSTP1    | glutathione S-transferase pi                                                                                                             | Yes |
|                     | 2952   | GSTT1    | glutathione S-transferase theta 1                                                                                                        | No  |
|                     | 3105   | HLA-A    | major histocompatibility complex, class I, A                                                                                             | Yes |
|                     | 3106   | HLA-B    | major histocompatibility complex, class I, B                                                                                             | Yes |
|                     | 3107   | HLA-C    | major histocompatibility complex, class I, C                                                                                             | Yes |
|                     | 3115   | HLA-DPB1 | major histocompatibility complex, class II, DP beta 1                                                                                    | Yes |
|                     | 3119   | HLA-DQB1 | major histocompatibility complex, class II, DQ beta 1                                                                                    | Yes |
|                     | 3123   | HLA-DRB1 | major histocompatibility complex, class II, DR beta 1                                                                                    | Yes |
|                     | 3265   | HRAS     | v-Ha-ras Harvey rat sarcoma viral oncogene homolog                                                                                       | Yes |

|                           |       |          |                                                                                                 |     |
|---------------------------|-------|----------|-------------------------------------------------------------------------------------------------|-----|
|                           | 3304  | HSPA1B   | heat shock 70kDa protein 1B                                                                     | Yes |
|                           | 3458  | IFNG     | interferon, gamma                                                                               | Yes |
|                           | 3586  | IL10     | interleukin 10                                                                                  | Yes |
|                           | 3856  | KRT8     | keratin 8                                                                                       | Yes |
|                           | 4257  | MGST1    | microsomal glutathione S-transferase 1                                                          | Yes |
|                           | 5444  | PON1     | paraoxonase 1                                                                                   | Yes |
|                           | 5644  | PRSS1    | protease, serine, 1 (trypsin 1)                                                                 | Yes |
|                           | 6648  | SOD2     | superoxide dismutase 2, mitochondrial                                                           | Yes |
|                           | 6690  | SPINK1   | serine peptidase inhibitor, Kazal type 1                                                        | Yes |
|                           | 7040  | TGFB1    | transforming growth factor, beta 1                                                              | Yes |
|                           | 7124  | TNF      | tumor necrosis factor (TNF superfamily, member 2)                                               | Yes |
|                           | 54658 | UGT1A1   | UDP glucuronosyltransferase 1 family, polypeptide A1                                            | No  |
|                           | 54578 | UGT1A6   | UDP glucuronosyltransferase 1 family, polypeptide A6                                            | No  |
|                           | 54577 | UGT1A7   | UDP glucuronosyltransferase 1 family, polypeptide A7                                            | No  |
|                           | 54576 | UGT1A8   | UDP glucuronosyltransferase 1 family, polypeptide A8                                            | No  |
| <b>Systemic sclerosis</b> | 1636  | ACE      | angiotensin I converting enzyme (peptidyl-dipeptidase A) 1                                      | Yes |
|                           | 6347  | CCL2     | chemokine (C-C motif) ligand 2                                                                  | Yes |
|                           | 930   | CD19     | CD19 molecule                                                                                   | Yes |
|                           | 1278  | COL1A2   | collagen, type I, alpha 2                                                                       | Yes |
|                           | 1281  | COL3A1   | collagen, type III, alpha 1 (Ehlers-Danlos syndrome type IV, autosomal dominant)                | Yes |
|                           | 1493  | CTLA4    | cytotoxic T-lymphocyte-associated protein 4                                                     | Yes |
|                           | 1535  | CYBA     | cytochrome b-245, alpha polypeptide                                                             | Yes |
|                           | 1557  | CYP2C19  | cytochrome P450, family 2, subfamily C, polypeptide 19                                          | Yes |
|                           | 1571  | CYP2E1   | cytochrome P450, family 2, subfamily E, polypeptide 1                                           | Yes |
|                           | 2200  | FBN1     | fibrillin 1                                                                                     | Yes |
|                           | 2335  | FN1      | fibronectin 1                                                                                   | Yes |
|                           | 3105  | HLA-A    | major histocompatibility complex, class I, A                                                    | Yes |
|                           | 3115  | HLA-DPB1 | major histocompatibility complex, class II, DP beta 1                                           | Yes |
|                           | 3117  | HLA-DQA1 | major histocompatibility complex, class II, DQ alpha 1                                          | No  |
|                           | 3119  | HLA-DQB1 | major histocompatibility complex, class II, DQ beta 1                                           | Yes |
|                           | 3123  | HLA-DRB1 | major histocompatibility complex, class II, DR beta 1                                           | Yes |
|                           | 3125  | HLA-DRB3 | major histocompatibility complex, class II, DR beta 3                                           | Yes |
|                           | 3126  | HLA-DRB4 | major histocompatibility complex, class II, DR beta 4                                           | No  |
|                           | 3127  | HLA-DRB5 | major histocompatibility complex, class II, DR beta 5                                           | Yes |
|                           | 3552  | IL1A     | interleukin 1, alpha                                                                            | Yes |
|                           | 4312  | MMP1     | matrix metalloproteinase 1 (interstitial collagenase)                                           | Yes |
|                           | 4846  | NOS3     | nitric oxide synthase 3 (endothelial cell)                                                      | Yes |
|                           | 5155  | PDGFB    | platelet-derived growth factor beta polypeptide (simian sarcoma viral (v-sis) oncogene homolog) | Yes |
|                           | 5788  | PTPRC    | protein tyrosine phosphatase, receptor type, C                                                  | Yes |
|                           | 6678  | SPARC    | secreted protein, acidic, cysteine-rich (osteonectin)                                           | Yes |
|                           | 6890  | TAP1     | transporter 1, ATP-binding cassette, sub-family B (MDR/TAP)                                     | Yes |
|                           | 6891  | TAP2     | transporter 2, ATP-binding cassette, sub-family B (MDR/TAP)                                     | Yes |
|                           | 7012  | TERC     | telomerase RNA component                                                                        | No  |
|                           | 7040  | TGFB1    | transforming growth factor, beta 1                                                              | Yes |
|                           | 7124  | TNF      | tumor necrosis factor (TNF superfamily, member 2)                                               | Yes |
|                           | 7133  | TNFRSF1B | tumor necrosis factor receptor superfamily, member 1B                                           | Yes |
| <b>Cirrhosis</b>          | 125   | ADH1B    | alcohol dehydrogenase 1B (class I), beta polypeptide                                            | No  |
|                           | 126   | ADH1C    | alcohol dehydrogenase 1C (class I), gamma polypeptide                                           | No  |
|                           | 217   | ALDH2    | aldehyde dehydrogenase 2 family (mitochondrial)                                                 | Yes |
|                           | 718   | C3       | complement component 3                                                                          | Yes |
|                           | 1312  | COMT     | catechol-O-methyltransferase                                                                    | Yes |
|                           | 1586  | CYP17A1  | cytochrome P450, family 17, subfamily A, polypeptide 1                                          | Yes |
|                           | 1571  | CYP2E1   | cytochrome P450, family 2, subfamily E, polypeptide 1                                           | Yes |
|                           | 2052  | EPHX1    | epoxide hydrolase 1, microsomal (xenobiotic)                                                    | No  |
|                           | 2950  | GSTP1    | glutathione S-transferase pi                                                                    | Yes |
|                           | 3077  | HFE      | hemochromatosis                                                                                 | Yes |
|                           | 3119  | HLA-DQB1 | major histocompatibility complex, class II, DQ beta 1                                           | Yes |
|                           | 3123  | HLA-DRB1 | major histocompatibility complex, class II, DR beta 1                                           | Yes |
|                           | 3162  | HMOX1    | heme oxygenase (decycling) 1                                                                    | Yes |
|                           | 3587  | IL10RA   | interleukin 10 receptor, alpha                                                                  | Yes |
|                           | 3552  | IL1A     | interleukin 1, alpha                                                                            | Yes |
|                           | 3553  | IL1B     | interleukin 1, beta                                                                             | Yes |

|  |       |          |                                                                                                      |     |
|--|-------|----------|------------------------------------------------------------------------------------------------------|-----|
|  | 3569  | IL6      | interleukin 6 (interferon, beta 2)                                                                   | Yes |
|  | 3576  | IL8      | interleukin 8                                                                                        | Yes |
|  | 55605 | KIF21A   | kinesin family member 21A                                                                            | No  |
|  | 4049  | LTA      | lymphotoxin alpha (TNF superfamily, member 1)                                                        | Yes |
|  | 4353  | MPO      | myeloperoxidase                                                                                      | No  |
|  | 4843  | NOS2A    | nitric oxide synthase 2A (inducible, hepatocytes)                                                    | Yes |
|  | 401   | PHOX2A   | paired-like homeobox 2a                                                                              | Yes |
|  | 5265  | SERPINA1 | serpin peptidase inhibitor, clade A (alpha-1 antitrypsin, antitrypsin), member 1                     | Yes |
|  | 6648  | SOD2     | superoxide dismutase 2, mitochondrial                                                                | Yes |
|  | 6716  | SRD5A2   | steroid-5-alpha-reductase, alpha polypeptide 2 (3-oxo-5 alpha-steroid delta 4-dehydrogenase alpha 2) | No  |
|  | 7037  | TFRC     | transferrin receptor (p90, CD71)                                                                     | Yes |
|  | 7040  | TGFB1    | transforming growth factor, beta 1                                                                   | Yes |
|  | 7124  | TNF      | tumor necrosis factor (TNF superfamily, member 2)                                                    | Yes |
|  | 7132  | TNFRSF1A | tumor necrosis factor receptor superfamily, member 1A                                                | Yes |
